# Supplementary material
Source: Springer Nature journal article supplement (https://www.springermedizin.de/resource/supplementary/12885_2010_2555_MOESM1_ESM.pdf/9462518)

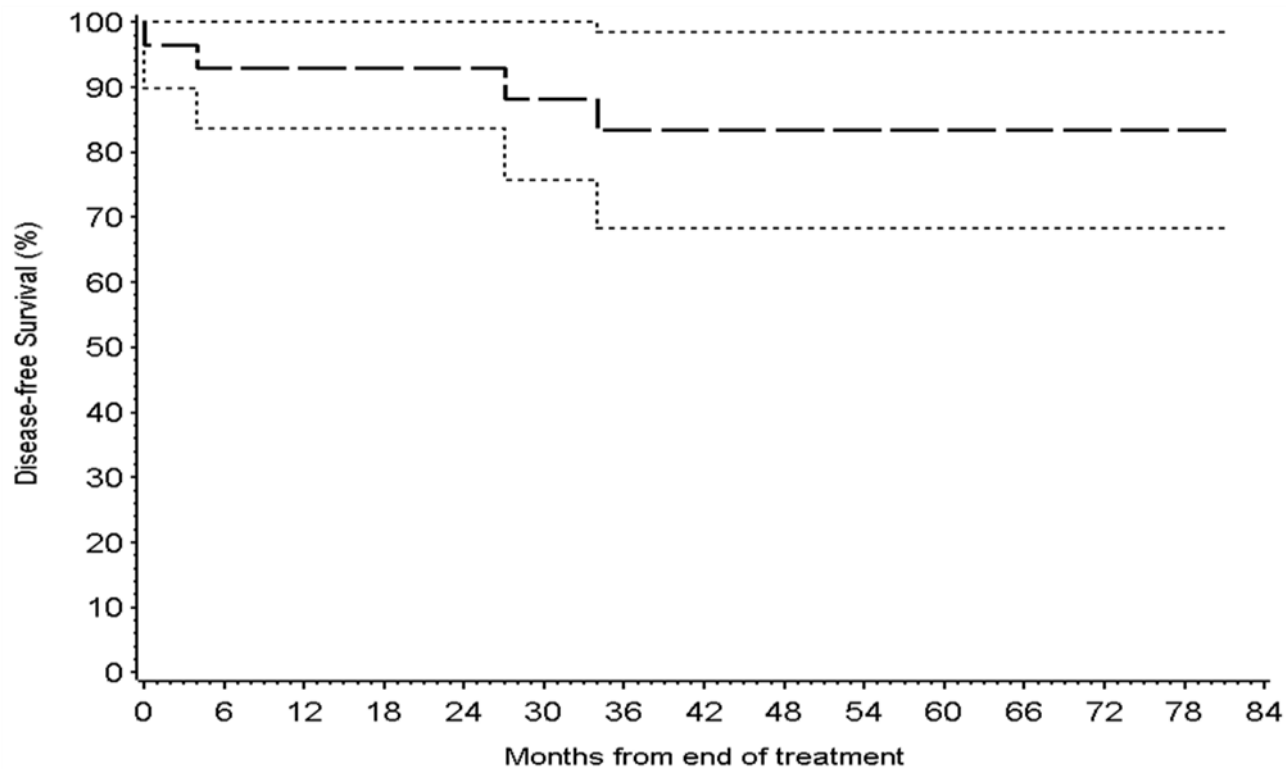

|          |     |            |            |             |             |             |             |
|----------|-----|------------|------------|-------------|-------------|-------------|-------------|
| Atrisk   | 29  | 26         | 22         | 17          | 9           | 6           | 3           |
| DFS (%)  | 100 | 93         | 93         | 83.4        | 83.4        | 83.4        | 83.4        |
| (95% CI) |     | (83.6-100) | (83.6-100) | (68.3-98.5) | (68.3-98.5) | (68.3-98.5) | (68.3-98.5) |

Supplement: MOESM1 [file 9462518]
